# Supplementary material for: DNA methylome regulates virulence and metabolism in Pseudomonas syringae
Source: eLife. 2025 Feb 24;13:RP96290. doi: 10.7554/eLife.96290 (PMC11850005; doi:10.7554/eLife.96290)
Supplement: Supplementary file 6. [file elife-96290-supp6.xlsx]

## Sheet: Strains
Strains	Description	Reference or Application
Psph 1448A	Wild type	Lab stock
Pst DC3000	Wild type	Lab stock
Pss B728a	Wild type	Lab stock
Psph 1448A ΔhsdMSR	Clean deletion of HsdMSR	This study
Psph 1449A ΔhsdMSR/p-hsdMS	Complementary of HsdMS	This study
E. coli DH5α	supE44 ΔlacU169(φ80lacZΔM15) hsdR17recA1 endA1 gyrA96thi-1 relA1λpir	Stratagene

## Sheet: Plasmids
Plasmids	Description	Source or reference
pMS402	Expression reporter plasmid carrying the promoterless luxCDABE; Knr	Duan et al., 2003
pMS402-hrpF-CAGCN6CTC	lux-reporter fused with the promoter of hrpF-CAGCN6CTC; Knr	This study
pMS402-hrpF- CCGCN6CTC	lux-reporter fused with the promoter of hrpF-CCGCN6CTC; Knr	This study
pMS402-hrpF- CCGCN6CGC	lux-reporter fused with the promoter of hrpF-CCGCN6CGC; Knr	This study
pK18 mobsacB	apK18 suicide plasmid used to mutant gene in P. syringae 1448A	Kvitko et al.,2011
pK19 mobsacB-HsdMSR	This plasmid was used to mutate hsdMSR in P. syringae 1448A	This study
pHM1-hsdMS	For overexpressed protein for HsdMS, sper	This study

## Sheet: Primers
Primers	Sequence
F-hsdMS-pHM1	ATGACCATGATTACGCCAAGCTT CAGCCAGCGCTTTGATTTGG
R-hsdMS-pHM1	GACCTGCAGGCATGCAAGCTT TCAGGCCCAGCTCGGTAC
(EcoRI)pK18-hsdMSR-up-F	AAACAGCTATGACATGATTACGAATTC CACACGTCGATTCAAAGACTTCG
(XbarI)pK18-hsdMSR-up-R	GCTCTAGAAGACATTAGCAAGCTAGGCGC
(XbarI)pK18-hsdMSR-down-F	GCTCTAGA ACTGCAAATACTCCAAATCAAAGC
(HindIII)pK18-hsdMSR-down-R	AACGACGGCCAGTGCCAAGCTT ATCGCCAGCAGCAGAAGG
hsdMSR-RT-F	CACCAGATCGAGTTGCTTGA
hsdMSR-RT-R	CGGTATGACGCCATAGGACT
hrpF-pMS402-F	TCGTCTTCACCTCGAGGGGATCC TGCGTCTGAGCGATGCCAA
hrpF-pMS402-R	GCGGCCGCAACTAGAGGATCC TCAAGCACGTCATCCACGT
hrpF_pMS402-Mu1-F1	TCGTCTTCACCTCGAGGGGATCC TGCGTCTGAGCGATGCCAA
hrpF_pMS402-Mu1-R1	AACCTTGAGTGGAGCAAACGGCG
hrpF_pMS402-Mu1-F2	ATGGAACCGCTCCCGCCGTTTGCTCCACTCAAG
hrpF_pMS402-Mu1-R2	GCGGCCGCAACTAGAGGATCC TCAAGCACGTCATCCACGT
hrpF_pMS402-Mu2-F1	TCGTCTTCACCTCGAGGGGATCC TGCGTCTGAGCGATGCCAA
hrpF_pMS402-Mu2-R1	AAGGTTCAAACCTTGAGTG GCGCAAACGGCGG
hrpF_pMS402-Mu2-F2	GGAACCGCTCCCGCCGTTTGCGCCACTCAAGGTTTGAACCTTCCTG
hrpF_pMS402-Mu2-R2	GCGGCCGCAACTAGAGGATCC TCAAGCACGTCATCCACGT
PSPPH_1357(rplS)-RT-F:	CGTTGTAATTGCCAAGCGTA
PSPPH_1357(rplS)-RT-R:	GGACAGGTCACGCAGGTAGT
PSPPH_4588 |rpsS-RT-F:	ATGATCCTGCCACAAATGGT
PSPPH_4588 |rpsS-RT-R:	ACGCTTGGCTTTCTTGTCTG
PSPPH_4593 |rpsJ-RT-F:	CGACTCGTAAAGAGCGGTTC
PSPPH_4593 |rpsJ-RT-R:	CGAGGCTGATCTGAACTTCC
PSPPH_4574 |rpmD-RT-F:	AACGCTGATCAAAAGCATGA
PSPPH_4574 |rpmD-RT-R:	CTCGACTCGCAGCATGTAGT
